# Supplementary material for: Coordination polymers of lanthanide complexes with benzene dicarboxylato ligands
Source: Royal Society of Chemistry journal article supplement (doi:10.1039/c3ce40357b), 2013-01-01
Supplement: c3ce40357b.pdf [file c3ce40357b.pdf]

# Supporting Information for

## **Coordination polymers of lanthanide complexes with benzene dicarboxylato ligands**

**Yu-Hui Luo,<sup>a</sup> Feng-Xia Yue,<sup>a</sup> Xiao-Yang Yu,<sup>ab</sup> Xin Chen,<sup>\*c</sup> and Hong Zhang<sup>\*a</sup>**

<sup>a</sup> *Institute of Polyoxometalate Chemistry, Department of Chemistry, Northeast Normal University, Changchun,  
Jilin 130024, P. R. China*

<sup>b</sup> *College of Chemical and Pharmaceutical Engineering, Jilin Institute of Chemical Technology, Jilin City, Jilin,  
132022, P. R. China*

<sup>c</sup> *School of Pharmaceutical & Life Sciences, Changzhou University, Changzhou, Jiangsu, 213164, P. R. China*

### Synthesis of complexes 2–9, 11–13 and 14.

**Nd(L<sup>1</sup>)<sub>1.5</sub>(H<sub>2</sub>O)<sub>2</sub>·H<sub>2</sub>O (2):** The procedure is similar to the synthesis of **1** except Pr(NO<sub>3</sub>)<sub>3</sub>·6H<sub>2</sub>O was replaced by Nd(NO<sub>3</sub>)<sub>3</sub>·6H<sub>2</sub>O (43.8 mg, 0.1 mmol). Light-purple block crystals of **2** were obtained in a yield of 65% based on Nd. Elemental Anal. Calcd for C<sub>33</sub>H<sub>24</sub>NdO<sub>12</sub> (756.76): C, 52.37; H, 3.19%. Found: C, 52.45; H, 3.13%. IR bands (KBr pellet, cm<sup>-1</sup>): 3420 (m), 3058 (w), 1668 (s), 1640 (m), 1596 (m), 1479 (w), 1444 (w), 1398 (s), 1339 (m), 1255 (m), 1177 (w), 1020 (w), 950 (w), 923 (m), 891 (m), 803 (m), 770 (m), 692 (m), 620 (m), 523 (m), 489(m).

**Sm(L<sup>1</sup>)<sub>1.5</sub>(H<sub>2</sub>O)<sub>2</sub>·H<sub>2</sub>O (3):** The procedure is similar to the synthesis of **1** except Pr(NO<sub>3</sub>)<sub>3</sub>·6H<sub>2</sub>O was replaced by Sm(NO<sub>3</sub>)<sub>3</sub>·6H<sub>2</sub>O (44.4 mg, 0.1 mmol). Light-yellow block crystals of **3** were obtained in a yield of 60% based on Sm. Elemental Anal. Calcd for C<sub>33</sub>H<sub>24</sub>SmO<sub>12</sub> (762.87): C, 51.95; H, 3.17%. Found: C, 51.87; H, 3.23%. IR bands (KBr pellet, cm<sup>-1</sup>): 3444 (m), 3058 (w), 1670 (s), 1596 (s), 1481 (m), 1445 (m), 1400 (s), 1338 (m), 1255 (s), 1177 (m), 1147 (m), 1043 (w), 951 (w), 922 (m), 892 (w), 804 (m), 772 (w), 716 (m), 694 (m), 621 (w), 522(m), 490(m).

**Eu(L<sup>1</sup>)<sub>1.5</sub>(H<sub>2</sub>O)<sub>2</sub>·H<sub>2</sub>O (4):** The procedure is similar to the synthesis of **1** except Pr(NO<sub>3</sub>)<sub>3</sub>·6H<sub>2</sub>O was replaced by Eu(NO<sub>3</sub>)<sub>3</sub>·6H<sub>2</sub>O (44.6 mg, 0.1 mmol). Colorless block crystals of **4** were obtained in a yield of 65% based on Eu. Elemental Anal. Calcd for C<sub>33</sub>H<sub>24</sub>EuO<sub>12</sub> (764.48): C, 51.84; H, 3.16%. Found: C, 51.77; H, 3.20%. IR bands (KBr pellet, cm<sup>-1</sup>): 3445 (m), 3058 (w), 1659 (s), 1597 (s), 1482 (m), 1446 (m), 1402 (s), 1340 (m), 1255 (m), 1178 (w), 1147 (w), 1043 (w), 951 (w), 922 (m), 840 (w), 805 (m), 773 (w), 716 (w), 696 (m), 621 (w), 523(m), 492(m).

**Gd(L<sup>1</sup>)<sub>1.5</sub>(H<sub>2</sub>O)<sub>2</sub>·H<sub>2</sub>O (5):** The procedure is similar to the synthesis of **1** except Pr(NO<sub>3</sub>)<sub>3</sub>·6H<sub>2</sub>O was replaced by Gd(NO<sub>3</sub>)<sub>3</sub>·6H<sub>2</sub>O (45.1 mg, 0.1 mmol). Colorless block crystals of **5** were obtained in a yield of 55% based on Gd. Elemental Anal. Calcd for C<sub>33</sub>H<sub>24</sub>GdO<sub>12</sub> (769.77): C, 51.49; H, 3.14%. Found: C, 51.55; H, 3.19%. IR bands (KBr pellet, cm<sup>-1</sup>): 3445 (m), 3059 (w), 1660 (s), 1640 (m), 1598 (s), 1482 (m), 1447 (m), 1402 (s), 1341 (m), 1255 (m), 1178 (w), 1022

(w), 950 (w), 923 (m), 891 (m), 805 (m), 772 (w), 694 (w), 628 (w), 523 (m), 492(m).

**Tb(L<sup>1</sup>)<sub>1.5</sub>(H<sub>2</sub>O)<sub>2</sub>·H<sub>2</sub>O (6):** The procedure is similar to the synthesis of **1** except Pr(NO<sub>3</sub>)<sub>3</sub>·6H<sub>2</sub>O was replaced by Tb(NO<sub>3</sub>)<sub>3</sub>·6H<sub>2</sub>O (45.3 mg, 0.1 mmol). Colorless block crystals of **6** were obtained in a yield of 45% based on Tb. Elemental Anal. Calcd for C<sub>33</sub>H<sub>24</sub>TbO<sub>12</sub> (771.46): C, 51.38; H, 3.14%. Found: C, 51.45; H, 3.20%.

**Dy(L<sup>1</sup>)<sub>1.5</sub>(H<sub>2</sub>O)<sub>2</sub>·H<sub>2</sub>O (7):** The procedure is similar to the synthesis of **1** except Pr(NO<sub>3</sub>)<sub>3</sub>·6H<sub>2</sub>O was replaced by Dy(NO<sub>3</sub>)<sub>3</sub>·6H<sub>2</sub>O (45.6 mg, 0.1 mmol). Colorless block crystals of **7** were obtained in a yield of 40% based on Dy. Elemental Anal. Calcd for C<sub>33</sub>H<sub>24</sub>DyO<sub>12</sub> (775.04): C, 51.14; H, 3.12%. Found: C, 51.25; H, 3.10%.

**Sm(L<sup>2</sup>)(phen)(OH) (8):** The procedure is similar to the synthesis of **10** except Tb(NO<sub>3</sub>)<sub>3</sub>·6H<sub>2</sub>O was replaced by Sm(NO<sub>3</sub>)<sub>3</sub>·6H<sub>2</sub>O (44.4 mg, 0.1 mmol). Light-yellow prismatic crystals of **8** were obtained in a yield of 43% based on Sm. Elemental Anal. Calcd for C<sub>34</sub>H<sub>21</sub>SmN<sub>2</sub>O<sub>7</sub> (719.90): C, 56.73; H, 2.94; N, 3.89%. Found: C, 56.60; H, 2.90; N, 3.83%.

**Eu(L<sup>2</sup>)(phen)(OH) (9):** The procedure is similar to the synthesis of **10** except Tb(NO<sub>3</sub>)<sub>3</sub>·6H<sub>2</sub>O was replaced by Eu(NO<sub>3</sub>)<sub>3</sub>·6H<sub>2</sub>O (44.6 mg, 0.1 mmol). Colorless prismatic crystals of **9** were obtained in a yield of 48% based on Eu. Elemental Anal. Calcd for C<sub>34</sub>H<sub>21</sub>EuN<sub>2</sub>O<sub>7</sub> (721.50): C, 56.60; H, 2.93; N, 3.88%. Found: C, 56.78; H, 2.90; N, 3.83%.

**Dy(L<sup>2</sup>)(phen)(OH) (11):** The procedure is similar to the synthesis of **10** except Tb(NO<sub>3</sub>)<sub>3</sub>·6H<sub>2</sub>O was replaced by Dy(NO<sub>3</sub>)<sub>3</sub>·6H<sub>2</sub>O (45.6 mg, 0.1 mmol). Colorless prismatic crystals of **11** were obtained in a yield of 58% based on Dy. Elemental Anal. Calcd for C<sub>34</sub>H<sub>21</sub>DyN<sub>2</sub>O<sub>7</sub> (732.03): C, 55.78; H, 2.89; N, 3.83%. Found: C, 55.83; H, 2.91; N, 3.80%. IR bands (KBr pellet, cm<sup>-1</sup>): 3446 (s), 3059 (w), 1666 (s), 1594 (s), 1481 (m), 1447 (m), 1401 (s), 1340 (m), 1312 (w), 1256 (s), 1178 (s), 1140 (w), 1102 (w), 1020 (w), 951 (w), 926 (w), 892 (w), 806 (w), 767 (w), 723 (w), 625 (w), 572 (w), 493(w).

**Er(L<sup>2</sup>)(phen)(OH) (12):** The procedure is similar to the synthesis of **10** except that Tb(NO<sub>3</sub>)<sub>3</sub>·6H<sub>2</sub>O was replaced by Er(NO<sub>3</sub>)<sub>3</sub>·6H<sub>2</sub>O (46.1 mg, 0.1 mmol). Pink prismatic crystals of **12** were obtained in a yield of 43% based on Er. Elemental Anal. Calcd for C<sub>34</sub>H<sub>21</sub>ErN<sub>2</sub>O<sub>7</sub> (736.79): C, 55.42; H, 2.87; N, 3.80%. Found: C, 55.49; H, 2.83; N, 3.84%. IR bands (KBr pellet, cm<sup>-1</sup>): 3430 (s), 3073 (w), 1669 (s), 1589 (s), 1555 (m), 1518 (w), 1484 (m), 1394 (s), 1313 (w), 1254 (m), 1177 (w), 1139 (w), 1101 (w), 1043 (w), 920 (w), 892 (w), 844 (m), 776 (m), 725(m), 609(w), 498(w), 431(w).

**Yb(L<sup>2</sup>)(phen)(OH) (13):** The procedure is similar to the synthesis of **10** except Tb(NO<sub>3</sub>)<sub>3</sub>·6H<sub>2</sub>O was replaced by Yb(NO<sub>3</sub>)<sub>3</sub>·5H<sub>2</sub>O (44.9 mg, 0.1 mmol). Colorless prismatic crystals of **13** were obtained in a yield of 50% based on Yb. Elemental Anal. Calcd for C<sub>34</sub>H<sub>21</sub>YbN<sub>2</sub>O<sub>7</sub> (742.57): C, 54.99; H, 2.85; N, 3.77%. Found: C, 55.03; H, 2.82; N, 3.81%. IR bands (KBr pellet, cm<sup>-1</sup>): 3445 (s), 3060 (w), 1664 (s), 1596 (m), 1532 (w), 1481 (w), 1447 (m), 1405 (s), 1340 (m), 1257 (m), 1179 (w), 1073 (w), 1044 (w), 1021 (w), 1001(w), 927 (w), 894 (w), 837 (w), 807(m), 767 (m), 691(m), 524(w), 495(w).

**Er(L<sup>1</sup>)<sub>0.5</sub>(L<sup>2</sup>)(H<sub>2</sub>O)<sub>2</sub> (14):** The procedure is similar to the synthesis of **15** except Ho(NO<sub>3</sub>)<sub>3</sub>·5H<sub>2</sub>O was replaced by Er(NO<sub>3</sub>)<sub>3</sub>·6H<sub>2</sub>O (46.1 mg, 0.1 mmol). Pink block crystals of **14** were obtained in a yield of 62% based on Er. Elemental Anal. Calcd for C<sub>33</sub>H<sub>22</sub>ErO<sub>11</sub> (761.77): C, 52.03; H, 2.91%. Found: C, 52.08; H, 2.88%. IR bands (KBr pellet, cm<sup>-1</sup>): 3435 (m), 3059 (w), 1664 (s), 1595 (s), 1481 (m), 1447 (m), 1404 (s), 1340 (m), 1257 (s), 1179 (w), 1154 (w), 1043 (w), 952 (w), 927 (w), 894 (w), 807 (m), 767 (w), 738 (w), 641 (w), 626 (w), 525(w), 493(w).

Due to bad quality of crystals, we can not collect the single-crystal XRD data of **7** (Dy(III)), **8** (Sm(III)) and **9** (Eu(III)). The structure of compounds **7–9** was determined by powder XRD measurement. According to the powder XRD measurements, compounds **1–7** are isostructural and compounds **8–13** are isostructural.

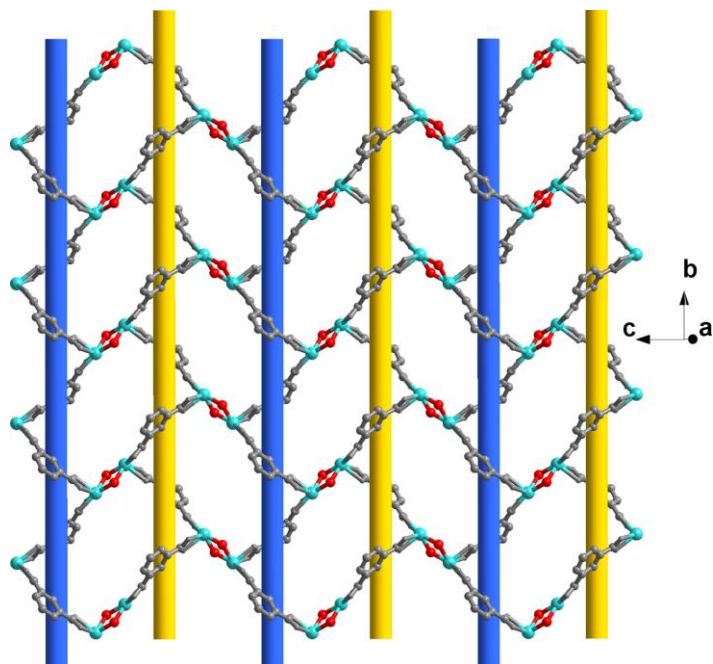

**Figure S1** The alternately arranged right- and left-handed chains are bridged by  $\mu_2$ -OH groups leading to an achiral 2D monolayer in **10**.

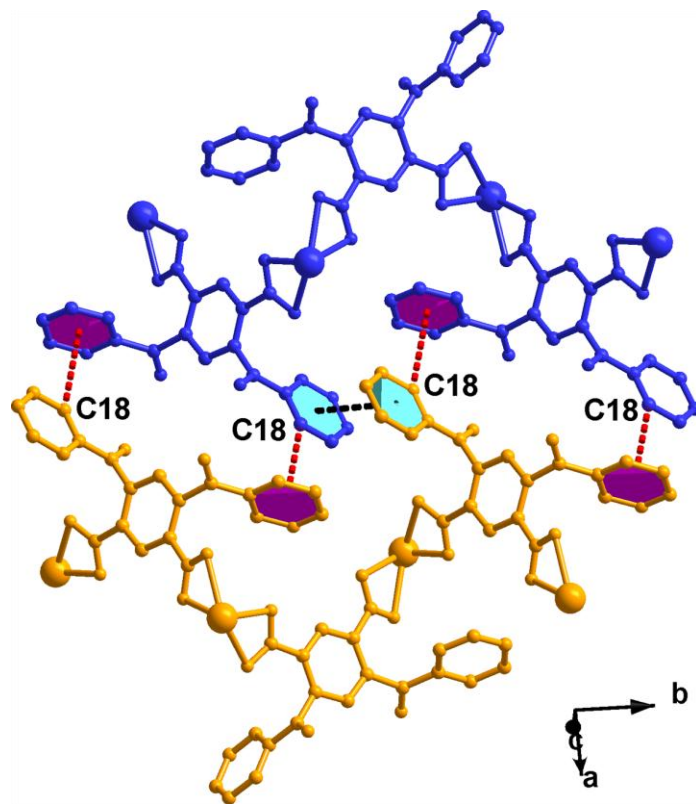

**Figure S2** The red and black dotted lines represent C18-H18 $\cdots\pi$  and  $\pi\cdots\pi$  interactions in **10**, respectively. Different layers are high-lighted with different colors.

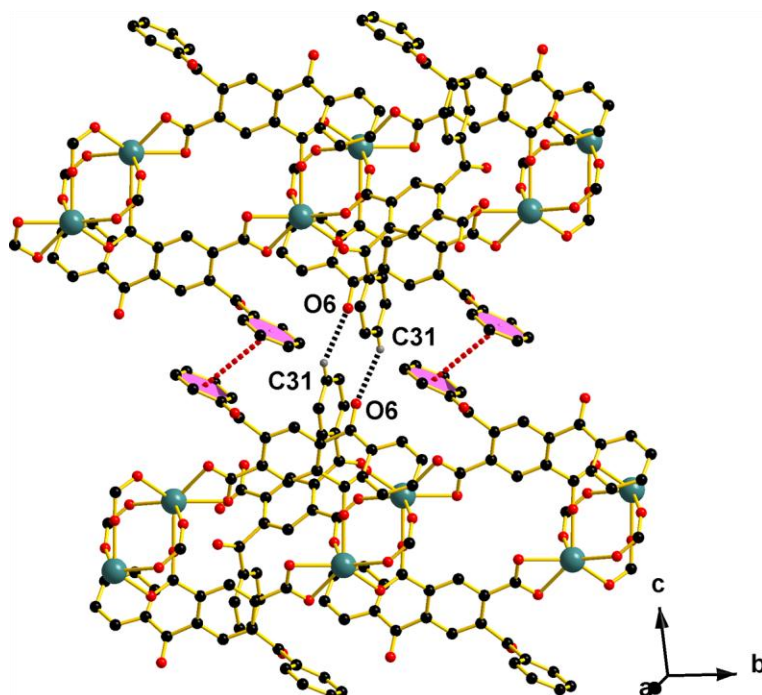

**Figure S3** The black and red dotted lines represent C31–H31...O6 and  $\pi\cdots\pi$  interactions in **15**, respectively.

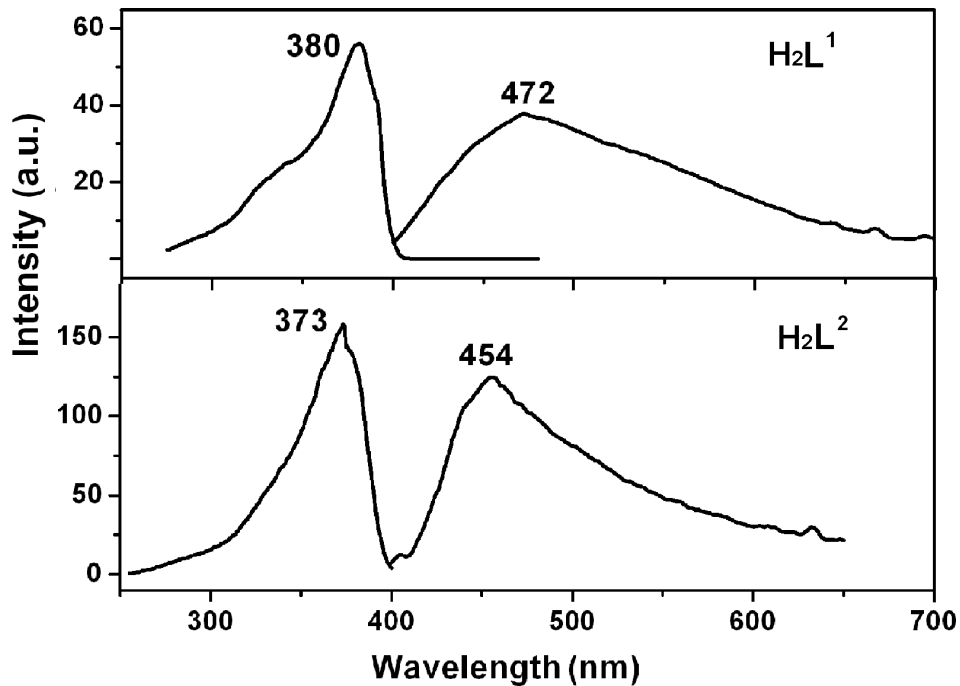

**Figure S4** Solid-state excitation and emission spectra of free ligands H<sub>2</sub>L<sup>1</sup> and H<sub>2</sub>L<sup>2</sup> at room temperature.

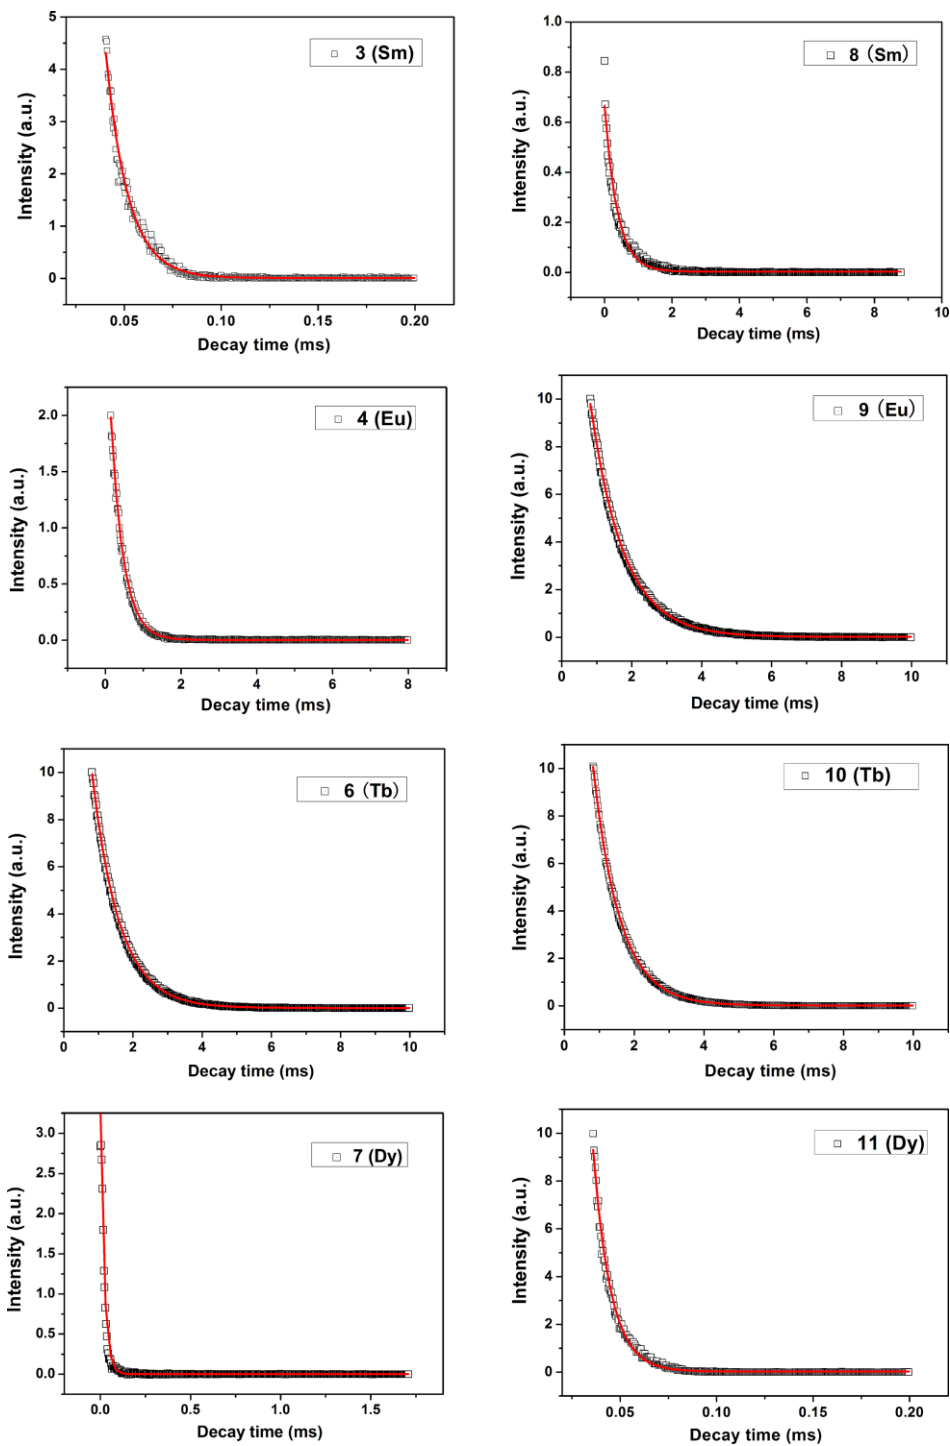

**Figure S5** Typical fluorescence decay curves (black) observed for **3–4** and **6–11** in the solid state at room temperature, and red lines are the corresponding monoexponential fits.

### Magnetic Property

The variable-temperature magnetic susceptibility of compound **5** was measured with a Quantum Design MPMS-XL superconducting quantum interference device (SQUID) magnetometer in the temperature range of 2–300 K at a field of 1 kOe, and diamagnetic corrections were made using Pascal's constants. The result is depicted in Figure 6 as  $\chi_M T$  versus  $T$  curve ( $\chi_M$  being the molar paramagnetic susceptibility). At 300 K,  $\chi_M T$  for **5** is  $16.45 \text{ cm}^3 \text{ K mol}^{-1}$  close to the expected value of  $15.75 \text{ cm}^3 \text{ K mol}^{-1}$  for two uncoupled free Gd(III) ( $S = 7/2$ ,  $L = 0$ ,  $^8S_{7/2}$ ,  $g = 2.0$ ,  $C = 7.875 \text{ cm}^3 \text{ K mol}^{-1}$ ) ions.  $\chi_M T$  remains almost constant at a value of  $\sim 16.11 \text{ cm}^3 \text{ K mol}^{-1}$  as the temperature decreases to  $\sim 11$  K, where the value starts to steadily drop to a value of  $15.58 \text{ cm}^3 \text{ K mol}^{-1}$  at 2.0 K. This behavior is indicative of weak antiferromagnetic exchange interaction between the Gd(III) ions in the molecule. A fit of the Curie–Weiss law  $\chi = C / (T - \theta)$  (Figure S6) between 2–300 K for **5** in a 1000 Oe applied field yields  $C = 16.37 \text{ cm}^3 \text{ K mol}^{-1}$  and  $\theta = -0.16$  K, suggesting an overall antiferromagnetic interaction among the Gd(III) ions. An attempt was made to fit the magnetic data to an isotropic exchange expression for a binuclear  $S = 7/2$  model. The equation (1) deduced from spin Hamiltonian,  $H = -JS_{\text{Gd1}}S_{\text{Gd2}}$ , is employed to simulation the magnetic susceptibility of the binuclear system.<sup>1</sup>

$$\chi_M T = \frac{2Ng^2\beta^2}{k} \frac{[e^{J/kT} + 5e^{3J/kT} + 14e^{6J/kT} + 30e^{10J/kT} + 55e^{15J/kT} + 91e^{21J/kT} + 140e^{28J/kT}]}{[1 + 3e^{J/kT} + 5e^{3J/kT} + 7e^{6J/kT} + 9e^{10J/kT} + 11e^{15J/kT} + 13e^{21J/kT} + 15e^{28J/kT}]} \quad (1)$$

In this expression,  $J$  denotes the exchange parameter between Gd(III) ions and  $N$ ,  $g$ ,  $\beta$  and  $k$  have their usual meanings. The best fitting of the susceptibility data in the temperature range 2–300 K gives  $J = -0.014 \text{ m}^{-1}$ ,  $g = 2.04$ . The small negative value of  $J$  further indicate that the presence of antiferromagnetic interactions among Gd(III) ions.



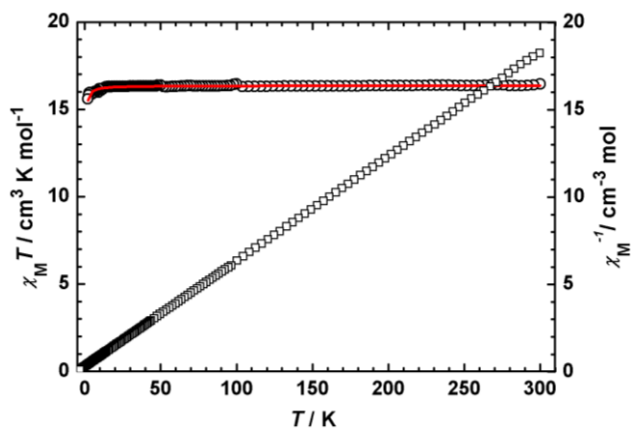

**Figure S6** Temperature dependence of  $\chi_M T$  (open circles) at 1000 Oe and  $\chi_M^{-1}$  (squares) for **5**. Solid red line is the best fit obtained with the model as described in the text.

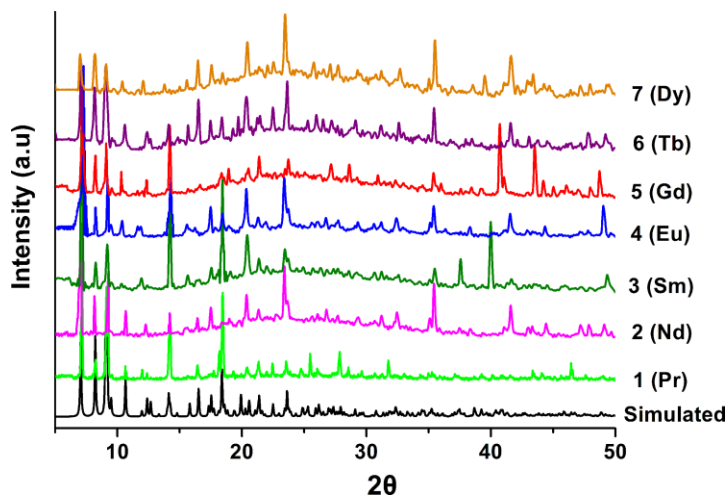

**Figure S7** PXRD patterns based on the X-ray single crystal diffraction of **1** and the experimental samples of **1–7**, respectively.

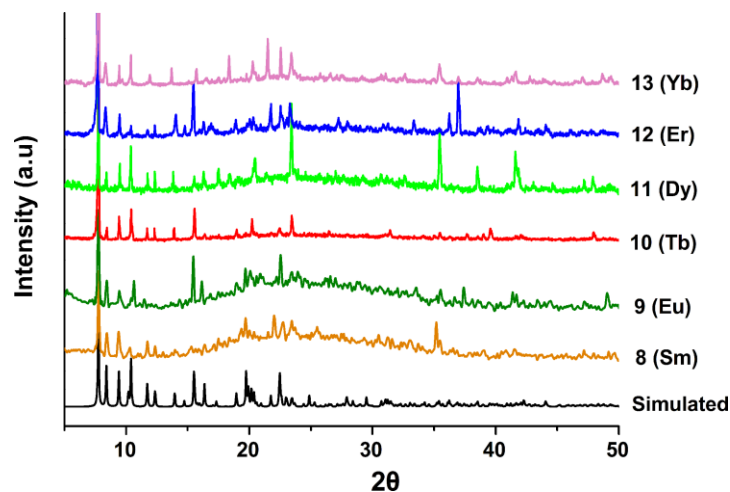

**Figure S8** PXRD patterns based on the X-ray single crystal diffraction of **10** and the experimental samples of **8–13**, respectively.

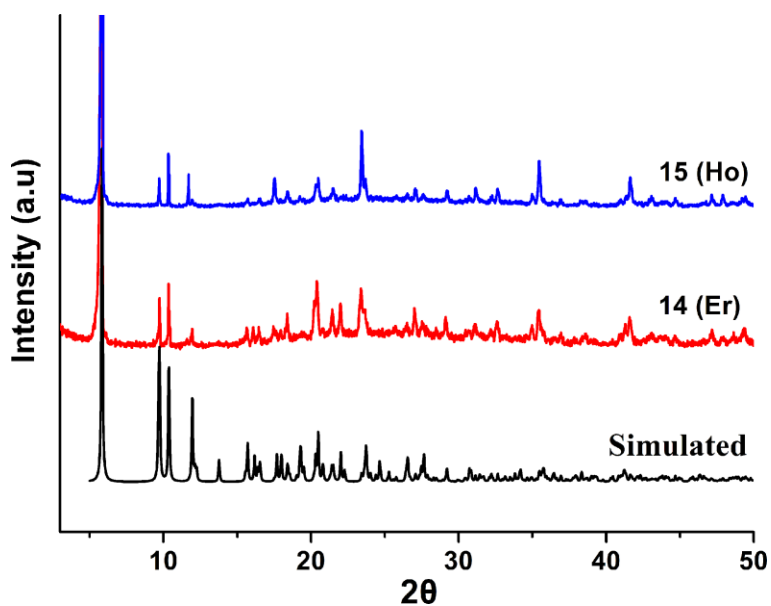

**Figure S9** PXRD patterns based on the X-ray single crystal diffraction of **14** and the experimental samples of **14–15**, respectively.

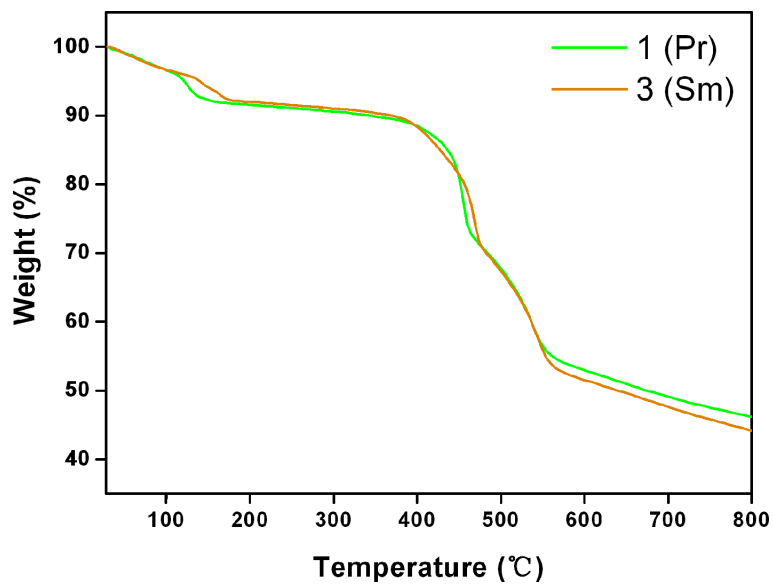

**Figure S10** TGA curves of **1** and **3** under N<sub>2</sub> atmosphere (5 °C min<sup>-1</sup>).

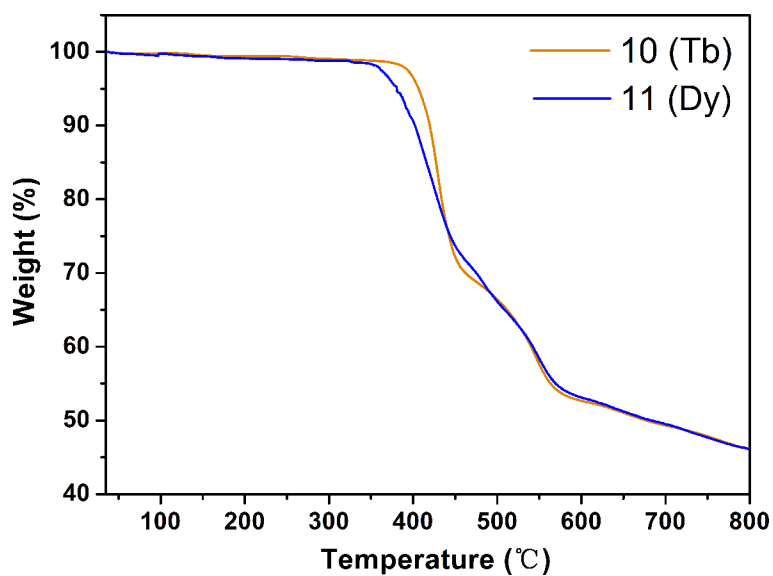

**Figure S11** TGA curves of **10** and **11** under N<sub>2</sub> atmosphere (5 °C min<sup>-1</sup>).

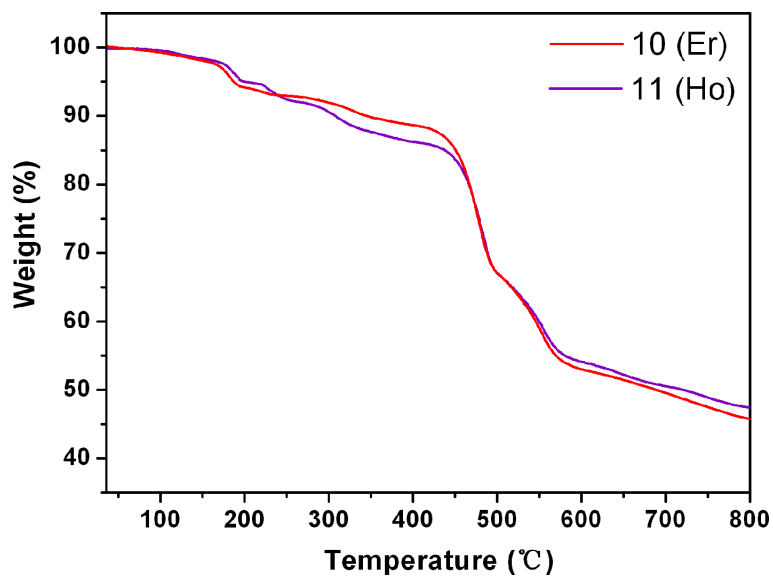

**Figure S12** TGA curves of **14** and **15** under N<sub>2</sub> atmosphere (5 °C min<sup>-1</sup>).

**Table S1.** Crystal data and structure refinement parameters for **2–5**, **7–9** and **10**.

| Complexes                                                                                                                   | <b>2-Nd</b>                                       | <b>3-Sm</b>                                       | <b>4-Eu</b>                                       | <b>5-Gd</b>                                       | <b>6-Tb</b>                                        |
|-----------------------------------------------------------------------------------------------------------------------------|---------------------------------------------------|---------------------------------------------------|---------------------------------------------------|---------------------------------------------------|----------------------------------------------------|
| Formula                                                                                                                     | C <sub>33</sub> H <sub>24</sub> NdO <sub>12</sub> | C <sub>33</sub> H <sub>24</sub> SmO <sub>12</sub> | C <sub>33</sub> H <sub>24</sub> EuO <sub>12</sub> | C <sub>33</sub> H <sub>24</sub> GdO <sub>12</sub> | C <sub>33</sub> H <sub>24</sub> O <sub>12</sub> Tb |
| Formula weight                                                                                                              | 756.76                                            | 762.87                                            | 764.48                                            | 769.77                                            | 771.44                                             |
| Space group                                                                                                                 | <i>P</i> $\bar{1}$                                 |
| <i>a</i> /Å                                                                                                                 | 10.4475(11)                                       | 10.4130(11)                                       | 10.3979(6)                                        | 10.4002(6)                                        | 10.3248(19)                                        |
| <i>b</i> /Å                                                                                                                 | 11.5142(6)                                        | 11.4804(18)                                       | 11.4388(6)                                        | 11.4239(6)                                        | 11.3302(18)                                        |
| <i>c</i> /Å                                                                                                                 | 14.0367(16)                                       | 14.1232(19)                                       | 14.1007(8)                                        | 14.1035(8)                                        | 14.0870(3)                                         |
| $\alpha$ /°                                                                                                                 | 102.313(7)                                        | 102.540(6)                                        | 102.635(5)                                        | 102.780(1)                                        | 102.938(14)                                        |
| $\beta$ /°                                                                                                                  | 110.938(10)                                       | 111.188(1)                                        | 111.321(5)                                        | 111.354(1)                                        | 111.170(17)                                        |
| $\gamma$ /°                                                                                                                 | 100.587(6)                                        | 100.429(3)                                        | 100.381(5)                                        | 100.275(1)                                        | 100.561(14)                                        |
| <i>V</i> /Å <sup>3</sup>                                                                                                    | 1476.9(2)                                         | 1472.9(3)                                         | 1460.95(14)                                       | 1458.80(14)                                       | 1433.0(5)                                          |
| <i>Z</i>                                                                                                                    | 2                                                 | 2                                                 | 2                                                 | 2                                                 | 2                                                  |
| $\mu$ /mm <sup>-1</sup>                                                                                                     | 1.826                                             | 2.062                                             | 2.216                                             | 2.342                                             | 2.538                                              |
| <i>F</i> (000)                                                                                                              | 756                                               | 760                                               | 762                                               | 764                                               | 766                                                |
| <i>R</i> <sub>int</sub>                                                                                                     | 0.0516                                            | 0.0301                                            | 0.0349                                            | 0.0180                                            | 0.0358                                             |
| GOF                                                                                                                         | 1.033                                             | 1.082                                             | 1.030                                             | 1.041                                             | 0.990                                              |
| <i>R</i> <sub>1</sub> <sup><i>a</i></sup> , <i>wR</i> <sub>2</sub> <sup><i>b</i></sup> [ <i>I</i> >2 $\sigma$ ( <i>I</i> )] | 0.0414, 0.0878                                    | 0.0329, 0.0873                                    | 0.0360, 0.0658                                    | 0.0280, 0.0669                                    | 0.0331, 0.0693                                     |
| <i>R</i> <sub>1</sub> <sup><i>a</i></sup> , <i>wR</i> <sub>2</sub> <sup><i>b</i></sup> (all data)                           | 0.0511, 0.0931                                    | 0.0393, 0.1026                                    | 0.0467, 0.0702                                    | 0.0308, 0.0687                                    | 0.0387, 0.0752                                     |

  

| Complexes      | <b>7-Dy</b>                                                     | <b>8-Er</b>                                                     | <b>9-Yb</b>                                                     | <b>10-Er</b>                                      |
|----------------|-----------------------------------------------------------------|-----------------------------------------------------------------|-----------------------------------------------------------------|---------------------------------------------------|
| Formula        | C <sub>34</sub> H <sub>20</sub> DyN <sub>2</sub> O <sub>7</sub> | C <sub>34</sub> H <sub>21</sub> ErN <sub>2</sub> O <sub>7</sub> | C <sub>34</sub> H <sub>21</sub> YbN <sub>2</sub> O <sub>7</sub> | C <sub>33</sub> H <sub>22</sub> ErO <sub>11</sub> |
| Formula weight | 732.02                                                          | 736.79                                                          | 742.57                                                          | 761.77                                            |
| Space group    | <i>P</i> 2 <sub>1</sub> / <i>c</i>                              | <i>P</i> 2 <sub>1</sub> / <i>c</i>                              | <i>P</i> 2 <sub>1</sub> / <i>c</i>                              | <i>P</i> $\bar{1}$                                |
| <i>a</i> /Å    | 11.9684(6)                                                      | 12.0185(4)                                                      | 12.0745(18)                                                     | 10.1324(8)                                        |
| <i>b</i> /Å    | 12.6499(4)                                                      | 12.6199(5)                                                      | 12.584(2)                                                       | 10.1905(9)                                        |
| <i>c</i> /Å    | 19.6347(17)                                                     | 19.5860(8)                                                      | 19.537(2)                                                       | 15.5442(10)                                       |
| $\alpha$ /°    | 90                                                              | 90                                                              | 90                                                              | 96.333(2)                                         |

|                                  |                |                |                |                |
|----------------------------------|----------------|----------------|----------------|----------------|
| $\beta/^\circ$                   | 108.000(6)     | 108.006(3)     | 108.000(7)     | 97.155(3)      |
| $\gamma/^\circ$                  | 90             | 90             | 90             | 114.009(3)     |
| $V/\text{\AA}^3$                 | 2827.2(3)      | 2825.16(19)    | 2823.3(7)      | 1431.59(19)    |
| $Z$                              | 4              | 4              | 4              | 2              |
| $\mu/\text{mm}^{-1}$             | 2.698          | 3.026          | 3.368          | 2.997          |
| $F(000)$                         | 1440           | 1452           | 1460           | 752            |
| $R_{\text{int}}$                 | 0.0340         | 0.0522         | 0.0693         | 0.0515         |
| GOF                              | 1.038          | 0.900          | 1.076          | 1.109          |
| $R_1^a, wR_2^b [I > 2\sigma(I)]$ | 0.0349, 0.0706 | 0.0327, 0.0476 | 0.0422, 0.0748 | 0.0602, 0.1755 |
| $R_1^a, wR_2^b$ (all data)       | 0.0498, 0.0755 | 0.0494, 0.0519 | 0.0618, 0.0827 | 0.0662, 0.1956 |

$$^a R_1 = \frac{\sum ||F_o| - |F_c||}{\sum |F_o|}, \quad ^b wR_2 = \frac{\sum [w(F_o^2 - F_c^2)^2]}{\sum [w(F_o^2)^2]}^{1/2}$$

**Table S2.** The Ln...Ln distances (Å) and the average bonds length (Å) Ln–O and Ln–N of complexes **1–6** and **10–15**.

|           | <b>1–6</b>   |              |              |              |              |              |
|-----------|--------------|--------------|--------------|--------------|--------------|--------------|
| Complexes | <b>1-Pr</b>  | <b>2-Nd</b>  | <b>3-Sm</b>  | <b>4-Eu</b>  | <b>5-Gd</b>  | <b>6-Tb</b>  |
| Ln...Ln   | 4.0611(8)    | 4.0326(7)    | 4.0136(6)    | 3.9903(4)    | 3.9804(3)    | 3.9597(12)   |
| Ln–O      | 2.5262       | 2.5067       | 2.4840       | 2.4687       | 2.4593       | 2.4324       |
|           | <b>10–13</b> |              |              |              | <b>14–15</b> |              |
| Complexes | <b>10-Tb</b> | <b>11-Dy</b> | <b>12-Er</b> | <b>13-Yb</b> | <b>14-Er</b> | <b>15-Ho</b> |
| Ln...Ln   | 3.7009(3)    | 3.6758(3)    | 3.6435(5)    | 3.6073(6)    | 4.1971(5)    | 4.1902(4)    |
| Ln–O      | 2.3858       | 2.3692       | 2.3545       | 2.3368       | 2.3636       | 2.3647       |
| Ln–N      | 2.567        | 2.544        | 2.527        | 2.500        |              |              |

**Table S3.** Hydrogen-bonding geometry parameters (Å, °) for Complexes **1–6** and **10–15**.

| D–H...A | d(D–H)(Å) | d(H...A)(Å) | d(D...A)(Å) | ∠(DHA)(°) | Symmetry code |
|---------|-----------|-------------|-------------|-----------|---------------|
|---------|-----------|-------------|-------------|-----------|---------------|

| <b>Complex 1</b> |      |      |           |     |               |
|------------------|------|------|-----------|-----|---------------|
| O1W-H1WA...O3W   | 0.85 | 2.05 | 2.865(7)  | 160 |               |
| O2W-H2WA...O9    | 0.85 | 2.20 | 2.890(5)  | 138 | 2-x, 1-y, 1-z |
| O3W-H3WA...O2    | 0.85 | 2.07 | 2.842(7)  | 151 |               |
| O3W-H3WB...O7    | 0.85 | 2.34 | 3.071(6)  | 144 |               |
| C14-H14...O3     | 0.93 | 2.48 | 3.278(5)  | 143 |               |
| C25-H25...O2W    | 0.93 | 2.49 | 3.334(5)  | 151 |               |
| C30-H30...O3W    | 0.93 | 2.58 | 3.356(8)  | 142 | x, y, -1+z    |
| <b>Complex 2</b> |      |      |           |     |               |
| O1W-H1WB...O6    | 0.85 | 2.14 | 2.904(6)  | 149 | 2-x, 1-y, 1-z |
| O2W-H2WA...O3W   | 0.85 | 2.06 | 2.881(8)  | 163 | 1-x, 1-y, 1-z |
| O3W-H3WA...O2    | 0.85 | 2.06 | 2.839(7)  | 152 | 1-x, 1-y, 1-z |
| O3W-H3WB...O4    | 0.86 | 2.40 | 3.075(6)  | 136 |               |
| C14-H14...O1W    | 0.93 | 2.46 | 3.310(6)  | 152 |               |
| C21-H21...O3W    | 0.93 | 2.56 | 3.336(9)  | 142 | 1-x, 1-y, -z  |
| C25-H25...O3     | 0.93 | 2.48 | 3.280(7)  | 144 |               |
| <b>Complex 3</b> |      |      |           |     |               |
| O1W-H1WB...O6    | 0.86 | 2.23 | 2.928(7)  | 138 | 2-x, 1-y, 1-z |
| O2W-H2WB...O3W   | 0.86 | 2.09 | 2.877(8)  | 152 |               |
| O3W-H3WA...O2    | 0.85 | 2.14 | 2.830(9)  | 137 |               |
| O3W-H3WB...O5    | 0.85 | 2.34 | 3.113(7)  | 150 | 1-x, 1-y, 1-z |
| C14-H14A...O1W   | 0.93 | 2.44 | 3.297(7)  | 154 |               |
| C21-H21A...O3W   | 0.93 | 2.53 | 3.320(10) | 143 | x, y, -1+z    |
| C25-H25A...O3    | 0.93 | 2.49 | 3.282(7)  | 143 |               |
| <b>Complex 4</b> |      |      |           |     |               |
| O1W-H1WB...O3W   | 0.85 | 2.03 | 2.860(7)  | 167 | 1-x, 2-y, 1-z |
| O2W-H2WA...O6    | 0.85 | 2.12 | 2.944(6)  | 164 | 2-x, 1-y, 1-z |
| O3W-H3WA...O1    | 0.85 | 2.06 | 2.824(7)  | 149 | 1-x, 2-y, 1-z |
| O3W-H3WB...O5    | 0.85 | 2.51 | 3.097(6)  | 126 | x, 1+y, z     |
| C14-H14...O2W    | 0.93 | 2.41 | 3.278(6)  | 155 |               |
| C21-H21...O3W    | 0.93 | 2.52 | 3.314(8)  | 143 | 1-x, 2-y, -z  |
| C25-H25...O3     | 0.93 | 2.48 | 3.266(7)  | 143 |               |
| <b>Complex 5</b> |      |      |           |     |               |
| O1W-H1WA...O9    | 0.86 | 2.12 | 2.957(5)  | 163 | 2-x, 1-y, 1-z |
| O2W-H2WA...O3W   | 0.85 | 2.17 | 2.856(7)  | 138 |               |
| O3W-H3WC...O1    | 0.86 | 2.06 | 2.824(7)  | 149 |               |
| O3W-H3WD...O7    | 0.85 | 2.34 | 3.109(6)  | 150 | 1-x, 1-y, 1-z |
| C14-H14...O3     | 0.93 | 2.47 | 3.264(5)  | 143 |               |
| C25-H25...O1W    | 0.93 | 2.40 | 3.275(5)  | 156 |               |
| C32-H32...O3W    | 0.93 | 2.52 | 3.308(8)  | 143 | x, y, -1+z    |
| <b>Complex 6</b> |      |      |           |     |               |
| O1W-H1WA...O6    | 0.85 | 2.12 | 2.961(3)  | 146 | 1-x,-y,1-z    |
| O2W-H2WB...O3W   | 0.85 | 2.17 | 2.854(6)  | 132 | 1-x,1-y,1-z   |
| O3W-H3WC...O5    | 0.85 | 2.06 | 3.130(7)  | 149 | 1-x,1-y,1-z   |
| O3W-H3WD...O8    | 0.85 | 2.34 | 2.804(8)  | 148 | 1-x, 1-y, 1-z |

|                   |      |      |            |     |                    |
|-------------------|------|------|------------|-----|--------------------|
| C14-H14...O9      | 0.93 | 2.47 | 3.244(5)   | 144 |                    |
| C25-H25...O1W     | 0.93 | 2.40 | 3.231(4)   | 157 |                    |
| C32-H32...O3W     | 0.93 | 2.52 | 3.284(6)   | 143 | 1-x, 1-y, -z       |
| <b>Complex 10</b> |      |      |            |     |                    |
| C21-H21...O3      | 0.93 | 2.47 | 3.322(9)   | 153 | 2-x, -1/2+y, 3/2-z |
| <b>Complex 11</b> |      |      |            |     |                    |
| C19-H19...O5      | 0.93 | 2.47 | 3.324(8)   | 153 | -1+x, y, z         |
| <b>Complex 12</b> |      |      |            |     |                    |
| C12-H12...O5      | 0.93 | 2.44 | 3.295(7)   | 153 | 2-x, 1/2+y, 3/2-z  |
| <b>Complex 13</b> |      |      |            |     |                    |
| C20-H20...O6      | 0.93 | 2.43 | 3.287(11)  | 153 | 1+x, y, z          |
| <b>Complex 14</b> |      |      |            |     |                    |
| C31-H31...O5      | 0.93 | 2.61 | 3.3778(11) | 140 | x, y, -1+z         |
| <b>Complex 15</b> |      |      |            |     |                    |
| C31-H31...O6      | 0.93 | 2.63 | 3.3762(86) | 138 | 1-x, 1-y, -z       |

**Table S4.** X-H... $\pi$  Interactions in Complexes 1–6 and 10–15<sup>c</sup>.

| X-H... $\pi$      | H...C(g) (Å) | X-H...C(g) (°) | X...C(g) (Å) | Symmetry code       |
|-------------------|--------------|----------------|--------------|---------------------|
| <b>Complex 1</b>  |              |                |              |                     |
| C31-H31>Cg(2)     | 2.67         | 129            | 3.332(6)     | 2-x, 2-y, 1-z       |
| <b>Complex 2</b>  |              |                |              |                     |
| C20-H20>Cg(2)     | 2.67         | 129            | 3.329(9)     | 2-x, 2-y, 1-z       |
| <b>Complex 3</b>  |              |                |              |                     |
| C20-H20A>Cg(2)    | 2.66         | 128            | 3.316(9)     | 2-x, 2-y, 1-z       |
| <b>Complex 4</b>  |              |                |              |                     |
| C20-H20>Cg(2)     | 2.66         | 129            | 3.319(8)     | 2-x, 2-y, 1-z       |
| <b>Complex 5</b>  |              |                |              |                     |
| C31-H31>Cg(2)     | 2.65         | 128            | 3.305(7)     | 2-x, 2-y, 1-z       |
| <b>Complex 6</b>  |              |                |              |                     |
| C18-H18>Cg(4)     | 2.91         | 136            | 3.637(6)     | 2-x, 1-y, 2-z       |
| <b>Complex 7</b>  |              |                |              |                     |
| C22-H22>Cg(5)     | 2.91         | 136            | 3.642(6)     | -1+x, 1/2-y, -1/2+z |
| <b>Complex 8</b>  |              |                |              |                     |
| C15-H15>Cg(5)     | 2.92         | 137            | 3.658(6)     | 2-x, 1-y, 2-z       |
| <b>Complex 9</b>  |              |                |              |                     |
| C17-H17>Cg(5)     | 2.96         | 135            | 3.678(8)     | 1+x, 3/2-y, 1/2+z   |
| <b>Complex 10</b> |              |                |              |                     |
| O2W-H2WA>Cg(4)    | 2.51         | 161            | 3.330(8)     | x, y, z             |
| C12-H12>Cg(6)     | 2.76         | 150            | 3.595(10)    | 2-x, 2-y, 1-z       |
| C21-H21>Cg(3)     | 2.80         | 135            | 3.522(13)    | -1+x, y, z          |
| <b>Complex 11</b> |              |                |              |                     |



|                                                                                                        |      |     |          |                 |
|--------------------------------------------------------------------------------------------------------|------|-----|----------|-----------------|
| O2W-H2WB>Cg(3)                                                                                         | 2.54 | 156 | 3.350(5) | $x, y, z$       |
| C12-H12>Cg(4)                                                                                          | 2.80 | 136 | 3.526(8) | $-x, 1-y, 1-z$  |
| C19-H19>Cg(6)                                                                                          | 2.79 | 150 | 3.619(6) | $-1+x, -1+y, z$ |
| For 1: Cg(2): C6>C7>C8>C9>C10>C11                                                                      |      |     |          |                 |
| For 2: Cg(2): C6>C7>C8>C9>C10>C11                                                                      |      |     |          |                 |
| For 3: Cg(2): C6>C7>C8>C9>C10>C11                                                                      |      |     |          |                 |
| For 4: Cg(2): C6>C7>C8>C9>C10>C11                                                                      |      |     |          |                 |
| For 5: Cg(2): C6>C7>C8>C9>C10>C11                                                                      |      |     |          |                 |
| For 10: Cg(4): C6>C7>C8>C9>C10>C11                                                                     |      |     |          |                 |
| For 11: Cg(5): C10>C11>C12>C13>C14>C15                                                                 |      |     |          |                 |
| For 12: Cg(5): C17>C18>C19>C20>C21>C22                                                                 |      |     |          |                 |
| For 13: Cg(5): C9>C10>C11>C12>C13>C14                                                                  |      |     |          |                 |
| For 14: Cg(4): C17>C18>C19>C20>C21>C22; Cg(6): C28>C29>C30>C31>C32>C33; Cg(3): C10>C11>C12>C13>C14>C15 |      |     |          |                 |
| For 15: Cg(3): C10>C11>C12>C13>C14>C15; Cg(4): C17>C18>C19>C20>C21>C22; Cg(6): C28>C29>C30>C31>C32>C33 |      |     |          |                 |

**Table S5.**  $\pi \cdots \pi$  Interactions in Complexes 10–15<sup>d</sup>.

| Two rings         | Symmetry code            | Centroid-to-centroid distance (Å) | Dihedral angle (°) | Perpendicular distance of Cg(I) on ring J (Å) | Perpendicular distance of Cg(J) on ring I (Å) |
|-------------------|--------------------------|-----------------------------------|--------------------|-----------------------------------------------|-----------------------------------------------|
| <b>Complex 10</b> |                          |                                   |                    |                                               |                                               |
| Cg(5)>Cg(5)       | 2- $x$ , - $y$ , 2- $z$  | 3.935(4)                          | 0                  | -3.302(3)                                     | -3.302(3)                                     |
| Cg(6)>Cg(6)       | 1- $x$ , 2- $y$ , 1- $z$ | 3.646(4)                          | 0                  | -3.490(3)                                     | -3.490(3)                                     |
| <b>Complex 11</b> |                          |                                   |                    |                                               |                                               |
| Cg(6)>Cg(6)       | - $x$ , 1- $y$ , 1- $z$  | 3.919(3)                          | 0                  | 3.309(2)                                      | 3.310(2)                                      |
| Cg(7)>Cg(7)       | 1- $x$ , - $y$ , 1- $z$  | 3.610(3)                          | 0                  | -3.457(3)                                     | -3.457(3)                                     |
| <b>Complex 12</b> |                          |                                   |                    |                                               |                                               |
| Cg(4)>Cg(4)       | 2- $x$ , 2- $y$ , 2- $z$ | 3.881(3)                          | 0                  | -3.297(2)                                     | -3.296(2)                                     |
| Cg(6)>Cg(6)       | 1- $x$ , - $y$ , 1- $z$  | 3.6211(3)                         | 0                  | -3.447(2)                                     | -3.447(2)                                     |
| <b>Complex 13</b> |                          |                                   |                    |                                               |                                               |
| Cg(6)>Cg(6)       | 2- $x$ , 1- $y$ , 1- $z$ | 3.840(5)                          | 0                  | -3.272(3)                                     | -3.272(3)                                     |
| Cg(7)>Cg(7)       | 1- $x$ , 2- $y$ , 1- $z$ | 3.613(7)                          | 0                  | 3.442(3)                                      | 3.442(3)                                      |
| <b>Complex 14</b> |                          |                                   |                    |                                               |                                               |
| Cg(4)>Cg(4)       | 1- $x$ , 2- $y$ , 2- $z$ | 4.088(6)                          | 0                  | 3.740(4)                                      | 3.739(4)                                      |
| <b>Complex 15</b> |                          |                                   |                    |                                               |                                               |
| Cg(3)>Cg(3)       | 1- $x$ , 2- $y$ , 2- $z$ | 4.082(4)                          | 0                  | 3.731(3)                                      | 3.731(3)                                      |

<sup>d</sup>For 10: Cg(5): C17>C18>C19>C20>C21>C22; Cg(6): C26>C27>C28>C29>C30>C31  
 For 11: Cg(6): C17>C18>C19>C20>C21>C22; Cg(7): C26>C27>C28>C29>C30>C31

For **12**: Cg(4): C10>C11>C12>C13>C14>C15; Cg(6): C26>C27>C28>C29>C33>C34  
 For **13**: Cg(6): C16>C17>C18>C19>C20>C21; Cg(7): C26>C27>C28>C29>C33>C34  
 For **14**: Cg(4): C17>C18>C19>C20>C21>C22  
 For **15**: Cg(3): C10>C11>C12>C13>C14>C15

**Table S6.** Maximum emission wavelengths,  $\lambda_{\text{ex}}$  (nm),  $\tau$  ( $\mu\text{s}$ ) and  $\Phi_{\text{overall}}$  (%) of **3**, **4** and **6–11**.

| Complexes     | $\lambda_{\text{ex}}$ (nm) | $\tau$ ( $\mu\text{s}$ ) | $\Phi_{\text{overall}}$ (%) | Maximum emission wavelengths                                                                                                                                                                                                                                                                                                                          |
|---------------|----------------------------|--------------------------|-----------------------------|-------------------------------------------------------------------------------------------------------------------------------------------------------------------------------------------------------------------------------------------------------------------------------------------------------------------------------------------------------|
| <b>3(Sm)</b>  | 340                        | 11.5                     | 0.3                         | 562 ( $^4\text{G}_{5/2} \rightarrow ^6\text{H}_{5/2}$ ), 596 ( $^4\text{G}_{5/2} \rightarrow ^6\text{H}_{7/2}$ ), 642 ( $^4\text{G}_{5/2} \rightarrow ^6\text{H}_{9/2}$ ), 703 ( $^4\text{G}_{5/2} \rightarrow ^6\text{H}_{11/2}$ )                                                                                                                   |
| <b>4(Eu)</b>  | 350                        | 332                      | 17.2                        | 578 ( $^5\text{D}_0 \rightarrow ^7\text{F}_0$ ), 590 ( $^5\text{D}_0 \rightarrow ^7\text{F}_1$ ), 613 ( $^5\text{D}_0 \rightarrow ^7\text{F}_2$ ), 651 ( $^5\text{D}_0 \rightarrow ^7\text{F}_3$ ), 696 ( $^5\text{D}_0 \rightarrow ^7\text{F}_4$ )                                                                                                   |
| <b>6(Tb)</b>  | 290                        | 675                      | 26.3                        | 488 ( $^5\text{D}_4 \rightarrow ^7\text{F}_6$ ), 545 ( $^5\text{D}_4 \rightarrow ^7\text{F}_5$ ), 586 ( $^5\text{D}_4 \rightarrow ^7\text{F}_4$ ), 622 ( $^5\text{D}_4 \rightarrow ^7\text{F}_3$ ), 652 ( $^5\text{D}_4 \rightarrow ^7\text{F}_2$ ), 668 ( $^5\text{D}_4 \rightarrow ^7\text{F}_1$ ), 680 ( $^5\text{D}_4 \rightarrow ^7\text{F}_0$ ) |
| <b>7(Dy)</b>  | 290                        | 1.27                     | 0.9                         | 479 ( $^4\text{F}_{9/2} \rightarrow ^6\text{H}_{15/2}$ ), 574 ( $^4\text{F}_{9/2} \rightarrow ^6\text{H}_{13/2}$ ), 662 ( $^4\text{F}_{9/2} \rightarrow ^6\text{H}_{11/2}$ ), 751 ( $^4\text{F}_{9/2} \rightarrow ^6\text{H}_{9/2}$ )                                                                                                                 |
| <b>8(Sm)</b>  | 290                        | 49.2                     | 5.3                         | 563 ( $^4\text{G}_{5/2} \rightarrow ^6\text{H}_{5/2}$ ), 598 ( $^4\text{G}_{5/2} \rightarrow ^6\text{H}_{7/2}$ ), 645 ( $^4\text{G}_{5/2} \rightarrow ^6\text{H}_{9/2}$ ), 704 ( $^4\text{G}_{5/2} \rightarrow ^6\text{H}_{11/2}$ )                                                                                                                   |
| <b>9(Eu)</b>  | 290                        | 981                      | 55.4                        | 579 ( $^5\text{D}_0 \rightarrow ^7\text{F}_0$ ), 592 ( $^5\text{D}_0 \rightarrow ^7\text{F}_1$ ), 615 ( $^5\text{D}_0 \rightarrow ^7\text{F}_2$ ), 651 ( $^5\text{D}_0 \rightarrow ^7\text{F}_3$ ), 698 ( $^5\text{D}_0 \rightarrow ^7\text{F}_4$ )                                                                                                   |
| <b>10(Tb)</b> | 365                        | 762                      | 40.2                        | 489 ( $^5\text{D}_4 \rightarrow ^7\text{F}_6$ ), 548 ( $^5\text{D}_4 \rightarrow ^7\text{F}_5$ ), 585 ( $^5\text{D}_4 \rightarrow ^7\text{F}_4$ ), 621 ( $^5\text{D}_4 \rightarrow ^7\text{F}_3$ ), 651 ( $^5\text{D}_4 \rightarrow ^7\text{F}_2$ ), 669 ( $^5\text{D}_4 \rightarrow ^7\text{F}_1$ ), 680 ( $^5\text{D}_4 \rightarrow ^7\text{F}_0$ ) |
| <b>11(Dy)</b> | 365                        | 10.4                     | 2.0                         | 479 ( $^4\text{F}_{9/2} \rightarrow ^6\text{H}_{15/2}$ ), 574 ( $^4\text{F}_{9/2} \rightarrow ^6\text{H}_{13/2}$ ), 662 ( $^4\text{F}_{9/2} \rightarrow ^6\text{H}_{11/2}$ ), 750 ( $^4\text{F}_{9/2} \rightarrow ^6\text{H}_{9/2}$ )                                                                                                                 |

**Table S7.** Selected Bond distances ( $\text{\AA}$ ) and Angles ( $^\circ$ ) of **1–6** and **10–15**.

| <b>1</b>        |          |                 |           |                  |           |
|-----------------|----------|-----------------|-----------|------------------|-----------|
| Pr(1)-O(8)      | 2.440(2) | Pr(1)-O(2)      | 2.500(2)  | Pr(1)-O(2W)      | 2.548(3)  |
| Pr(1)-O(4)      | 2.457(2) | Pr(1)-O(7)      | 2.511(2)  | Pr(1)-O(1W)      | 2.581(3)  |
| Pr(1)-O(5)      | 2.472(2) | Pr(1)-O(1)      | 2.517(2)  | Pr(1)-O(8)#1     | 2.710(2)  |
| O(8)-Pr(1)-O(4) | 74.96(8) | O(5)-Pr(1)-O(1) | 135.49(9) | O(2)-Pr(1)-O(1W) | 72.93(10) |

|                 |           |                  |           |                    |            |
|-----------------|-----------|------------------|-----------|--------------------|------------|
| O(8)-Pr(1)-O(5) | 74.49(8)  | O(2)-Pr(1)-O(1)  | 52.04(8)  | O(7)-Pr(1)-O(1W)   | 69.45(9)   |
| O(4)-Pr(1)-O(5) | 136.31(8) | O(7)-Pr(1)-O(1)  | 125.82(8) | O(1)-Pr(1)-O(1W)   | 109.84(10) |
| O(8)-Pr(1)-O(2) | 139.20(8) | O(8)-Pr(1)-O(2W) | 95.50(9)  | O(2W)-Pr(1)-O(1W)  | 65.91(10)  |
| O(4)-Pr(1)-O(2) | 81.02(9)  | O(4)-Pr(1)-O(2W) | 139.51(9) | O(8)-Pr(1)-O(8)#1  | 76.03(8)   |
| O(5)-Pr(1)-O(2) | 140.87(9) | O(5)-Pr(1)-O(2W) | 73.99(9)  | O(4)-Pr(1)-O(8)#1  | 68.76(8)   |
| O(8)-Pr(1)-O(7) | 124.95(8) | O(2)-Pr(1)-O(2W) | 81.86(10) | O(5)-Pr(1)-O(8)#1  | 74.06(8)   |
| O(4)-Pr(1)-O(7) | 76.65(9)  | O(7)-Pr(1)-O(2W) | 134.86(9) | O(2)-Pr(1)-O(8)#1  | 124.60(8)  |
| O(5)-Pr(1)-O(7) | 96.45(9)  | O(1)-Pr(1)-O(2W) | 66.46(9)  | O(7)-Pr(1)-O(8)#1  | 49.84(8)   |
| O(2)-Pr(1)-O(7) | 79.20(8)  | O(8)-Pr(1)-O(1W) | 142.53(9) | O(1)-Pr(1)-O(8)#1  | 142.42(8)  |
| O(8)-Pr(1)-O(1) | 89.43(8)  | O(4)-Pr(1)-O(1W) | 140.25(9) | O(2W)-Pr(1)-O(8)#1 | 148.06(8)  |
| O(4)-Pr(1)-O(1) | 74.07(9)  | O(5)-Pr(1)-O(1W) | 69.26(10) | O(1W)-Pr(1)-O(8)#1 | 102.24(9)  |

## 2

|                   |            |                    |            |                     |            |
|-------------------|------------|--------------------|------------|---------------------|------------|
| Nd(1)-O(5)        | 2.414(3)   | Nd(1)-O(2)         | 2.476(3)   | Nd(1)-O(1W)         | 2.529(3)   |
| Nd(1)-O(8)        | 2.437(3)   | Nd(1)-O(4)#1       | 2.491(3)   | Nd(1)-O(2W)         | 2.557(3)   |
| Nd(1)-O(7)        | 2.453(3)   | Nd(1)-O(1)         | 2.502(3)   | Nd(1)-O(5)#1        | 2.701(3)   |
| O(5)-Nd(1)-O(8)   | 75.44(10)  | O(7)-Nd(1)-O(1)    | 135.34(11) | O(2)-Nd(1)-O(2W)    | 73.14(11)  |
| O(5)-Nd(1)-O(7)   | 74.32(10)  | O(2)-Nd(1)-O(1)    | 52.32(10)  | O(4)#1-Nd(1)-O(2W)  | 69.75(11)  |
| O(8)-Nd(1)-O(7)   | 136.34(10) | O(4)#1-Nd(1)-O(1)  | 126.20(10) | O(1)-Nd(1)-O(2W)    | 109.89(12) |
| O(5)-Nd(1)-O(2)   | 139.43(11) | O(5)-Nd(1)-O(1W)   | 94.93(10)  | O(1W)-Nd(1)-O(2W)   | 65.91(12)  |
| O(8)-Nd(1)-O(2)   | 80.96(11)  | O(8)-Nd(1)-O(1W)   | 139.51(12) | O(5)-Nd(1)-O(5)#1   | 76.07(10)  |
| O(7)-Nd(1)-O(2)   | 140.79(11) | O(7)-Nd(1)-O(1W)   | 74.01(11)  | O(8)-Nd(1)-O(5)#1   | 68.42(10)  |
| O(5)-Nd(1)-O(4)#1 | 125.06(10) | O(2)-Nd(1)-O(1W)   | 82.08(11)  | O(7)-Nd(1)-O(5)#1   | 74.22(10)  |
| O(8)-Nd(1)-O(4)#1 | 76.51(11)  | O(4)#1-Nd(1)-O(1W) | 135.17(11) | O(2)-Nd(1)-O(5)#1   | 124.46(10) |
| O(7)-Nd(1)-O(4)#1 | 96.21(11)  | O(1)-Nd(1)-O(1W)   | 66.20(12)  | O(4)#1-Nd(1)-O(5)#1 | 49.78(9)   |
| O(2)-Nd(1)-O(4)#1 | 79.25(11)  | O(5)-Nd(1)-O(2W)   | 141.87(11) | O(1)-Nd(1)-O(5)#1   | 142.29(11) |
| O(5)-Nd(1)-O(1)   | 89.33(10)  | O(8)-Nd(1)-O(2W)   | 140.45(11) | O(1W)-Nd(1)-O(5)#1  | 148.23(10) |
| O(8)-Nd(1)-O(1)   | 74.33(11)  | O(7)-Nd(1)-O(2W)   | 68.88(11)  | O(2W)-Nd(1)-O(5)#1  | 102.57(11) |

## 3

|            |          |              |          |              |          |
|------------|----------|--------------|----------|--------------|----------|
| Sm(1)-O(4) | 2.385(3) | Sm(1)-O(5)#1 | 2.451(3) | Sm(1)-O(1W)  | 2.500(3) |
| Sm(1)-O(8) | 2.420(3) | Sm(1)-O(2)   | 2.455(4) | Sm(1)-O(2W)  | 2.537(4) |
| Sm(1)-O(7) | 2.420(3) | Sm(1)-O(1)   | 2.488(3) | Sm(1)-O(4)#1 | 2.700(3) |

|                   |            |                    |            |                     |            |
|-------------------|------------|--------------------|------------|---------------------|------------|
| O(4)-Sm(1)-O(8)   | 75.39(11)  | O(7)-Sm(1)-O(1)    | 135.47(12) | O(5)#1-Sm(1)-O(2W)  | 69.38(12)  |
| O(4)-Sm(1)-O(7)   | 74.94(11)  | O(5)#1-Sm(1)-O(1)  | 126.83(12) | O(2)-Sm(1)-O(2W)    | 72.80(13)  |
| O(8)-Sm(1)-O(7)   | 136.64(11) | O(2)-Sm(1)-O(1)    | 52.90(11)  | O(1)-Sm(1)-O(2W)    | 110.18(12) |
| O(4)-Sm(1)-O(5)#1 | 125.45(11) | O(4)-Sm(1)-O(1W)   | 94.46(12)  | O(1W)-Sm(1)-O(2W)   | 66.18(12)  |
| O(8)-Sm(1)-O(5)#1 | 77.09(11)  | O(8)-Sm(1)-O(1W)   | 139.12(12) | O(4)-Sm(1)-O(4)#1   | 75.94(11)  |
| O(7)-Sm(1)-O(5)#1 | 95.50(12)  | O(7)-Sm(1)-O(1W)   | 74.10(12)  | O(8)-Sm(1)-O(4)#1   | 69.02(10)  |
| O(4)-Sm(1)-O(2)   | 139.17(11) | O(5)#1-Sm(1)-O(1W) | 135.15(12) | O(7)-Sm(1)-O(4)#1   | 73.59(11)  |
| O(8)-Sm(1)-O(2)   | 80.86(12)  | O(2)-Sm(1)-O(1W)   | 82.27(13)  | O(5)#1-Sm(1)-O(4)#1 | 50.33(11)  |
| O(7)-Sm(1)-O(2)   | 140.48(12) | O(1)-Sm(1)-O(1W)   | 66.26(12)  | O(2)-Sm(1)-O(4)#1   | 125.05(11) |
| O(5)#1-Sm(1)-O(2) | 79.34(12)  | O(4)-Sm(1)-O(2W)   | 142.28(12) | O(1)-Sm(1)-O(4)#1   | 142.23(11) |
| O(4)-Sm(1)-O(1)   | 88.42(11)  | O(8)-Sm(1)-O(2W)   | 140.33(12) | O(1W)-Sm(1)-O(4)#1  | 147.67(11) |
| O(8)-Sm(1)-O(1)   | 73.86(11)  | O(7)-Sm(1)-O(2W)   | 68.82(13)  | O(2W)-Sm(1)-O(4)#1  | 102.78(12) |

---

4

|                     |            |                    |            |                     |            |
|---------------------|------------|--------------------|------------|---------------------|------------|
| Eu(1)-O(4)          | 2.367(2)   | Eu(1)-O(5)#1       | 2.435(3)   | Eu(1)-O(2W)         | 2.481(3)   |
| Eu(1)-O(7)          | 2.403(3)   | Eu(1)-O(1)         | 2.435(3)   | Eu(1)-O(1W)         | 2.519(3)   |
| Eu(1)-O(8)#1        | 2.403(3)   | Eu(1)-O(2)         | 2.480(3)   | Eu(1)-O(4)#1        | 2.695(3)   |
| O(4)-Eu(1)-O(7)     | 75.65(9)   | O(8)#1-Eu(1)-O(2)  | 135.58(10) | O(5)#1-Eu(1)-O(1W)  | 69.67(10)  |
| O(4)-Eu(1)-O(8)#1   | 75.16(9)   | O(5)#1-Eu(1)-O(2)  | 127.03(10) | O(1)-Eu(1)-O(1W)    | 72.75(10)  |
| O(7)-Eu(1)-O(8)#1   | 136.68(10) | O(1)-Eu(1)-O(2)    | 53.08(9)   | O(2)-Eu(1)-O(1W)    | 109.90(11) |
| O(4)-Eu(1)-O(5)#1   | 125.72(10) | O(4)-Eu(1)-O(2W)   | 94.02(10)  | O(2W)-Eu(1)-O(1W)   | 66.10(10)  |
| O(7)-Eu(1)-O(5)#1   | 77.01(10)  | O(7)-Eu(1)-O(2W)   | 138.96(11) | O(4)-Eu(1)-O(4)#1   | 76.15(10)  |
| O(8)#1-Eu(1)-O(5)#1 | 95.18(10)  | O(8)#1-Eu(1)-O(2W) | 74.38(11)  | O(7)-Eu(1)-O(4)#1   | 68.97(9)   |
| O(4)-Eu(1)-O(1)     | 139.00(10) | O(5)#1-Eu(1)-O(2W) | 135.38(10) | O(8)#1-Eu(1)-O(4)#1 | 73.44(9)   |
| O(7)-Eu(1)-O(1)     | 80.61(10)  | O(1)-Eu(1)-O(2W)   | 82.45(10)  | O(5)#1-Eu(1)-O(4)#1 | 50.37(9)   |
| O(8)#1-Eu(1)-O(1)   | 140.50(10) | O(2)-Eu(1)-O(2W)   | 65.97(11)  | O(1)-Eu(1)-O(4)#1   | 124.95(9)  |
| O(5)#1-Eu(1)-O(1)   | 79.27(10)  | O(4)-Eu(1)-O(1W)   | 142.20(10) | O(2)-Eu(1)-O(4)#1   | 142.23(9)  |
| O(4)-Eu(1)-O(2)     | 88.10(10)  | O(7)-Eu(1)-O(1W)   | 140.35(9)  | O(2W)-Eu(1)-O(4)#1  | 147.78(10) |
| O(7)-Eu(1)-O(2)     | 73.96(10)  | O(8)#1-Eu(1)-O(1W) | 68.75(10)  | O(1W)-Eu(1)-O(4)#1  | 103.20(10) |

---

5

|            |          |              |          |             |          |
|------------|----------|--------------|----------|-------------|----------|
| Gd(1)-O(8) | 2.354(2) | Gd(1)-O(7)#1 | 2.424(2) | Gd(1)-O(1W) | 2.475(3) |
| Gd(1)-O(5) | 2.388(2) | Gd(1)-O(1)   | 2.425(2) | Gd(1)-O(2W) | 2.509(3) |

|                     |           |                    |            |                     |            |
|---------------------|-----------|--------------------|------------|---------------------|------------|
| Gd(1)-O(4)#1        | 2.395(2)  | Gd(1)-O(2)         | 2.465(3)   | Gd(1)-O(8)#1        | 2.699(3)   |
| O(8)-Gd(1)-O(5)     | 75.94(8)  | O(4)#1-Gd(1)-O(2)  | 135.32(9)  | O(7)#1-Gd(1)-O(2W)  | 69.49(9)   |
| O(8)-Gd(1)-O(4)#1   | 75.15(9)  | O(7)#1-Gd(1)-O(2)  | 127.53(9)  | O(1)-Gd(1)-O(2W)    | 72.69(10)  |
| O(5)-Gd(1)-O(4)#1   | 136.81(8) | O(1)-Gd(1)-O(2)    | 53.29(9)   | O(2)-Gd(1)-O(2W)    | 109.89(10) |
| O(8)-Gd(1)-O(7)#1   | 125.96(9) | O(8)-Gd(1)-O(1W)   | 93.67(9)   | O(1W)-Gd(1)-O(2W)   | 66.09(10)  |
| O(5)-Gd(1)-O(7)#1   | 77.16(9)  | O(5)-Gd(1)-O(1W)   | 139.11(10) | O(8)-Gd(1)-O(8)#1   | 76.25(9)   |
| O(4)#1-Gd(1)-O(7)#1 | 94.92(9)  | O(4)#1-Gd(1)-O(1W) | 74.16(9)   | O(5)-Gd(1)-O(8)#1   | 68.97(8)   |
| O(8)-Gd(1)-O(1)     | 138.91(9) | O(7)#1-Gd(1)-O(1W) | 135.26(9)  | O(4)#1-Gd(1)-O(8)#1 | 73.44(8)   |
| O(5)-Gd(1)-O(1)     | 80.48(9)  | O(1)-Gd(1)-O(1W)   | 82.66(10)  | O(7)#1-Gd(1)-O(8)#1 | 50.44(8)   |
| O(4)#1-Gd(1)-O(1)   | 140.50(9) | O(2)-Gd(1)-O(1W)   | 65.97(10)  | O(1)-Gd(1)-O(8)#1   | 125.05(8)  |
| O(7)#1-Gd(1)-O(1)   | 79.44(9)  | O(8)-Gd(1)-O(2W)   | 142.17(9)  | O(2)-Gd(1)-O(8)#1   | 142.26(9)  |
| O(8)-Gd(1)-O(2)     | 87.77(9)  | O(5)-Gd(1)-O(2W)   | 140.16(9)  | O(1W)-Gd(1)-O(8)#1  | 147.54(9)  |
| O(5)-Gd(1)-O(2)     | 74.09(9)  | O(4)#1-Gd(1)-O(2W) | 68.81(9)   | O(2W)-Gd(1)-O(8)#1  | 103.35(9)  |

---

**6**

|                     |            |                    |            |                     |            |
|---------------------|------------|--------------------|------------|---------------------|------------|
| Tb(1)-O(4)          | 2.319(3)   | Tb(1)-O(5)#1       | 2.379(3)   | Tb(1)-O(1W)         | 2.461(3)   |
| Tb(1)-O(1)          | 2.363(3)   | Tb(1)-O(8)         | 2.398(3)   | Tb(1)-O(2W)         | 2.488(3)   |
| Tb(1)-O(2)#1        | 2.366(3)   | Tb(1)-O(7)         | 2.422(3)   | Tb(1)-O(4)#1        | 2.696(3)   |
| O(4)-Tb(1)-O(1)     | 76.22(10)  | O(5)#1-Tb(1)-O(7)  | 128.34(11) | O(2)#1-Tb(1)-O(7)   | 134.80(11) |
| O(4)-Tb(1)-O(2)#1   | 75.03(10)  | O(8)-Tb(1)-O(7)    | 53.50(10)  | O(8)-Tb(1)-O(2W)    | 72.17(12)  |
| O(1)-Tb(1)-O(2)#1   | 136.67(10) | O(4)-Tb(1)-O(1W)   | 92.85(11)  | O(7)-Tb(1)-O(2W)    | 108.38(12) |
| O(4)-Tb(1)-O(5)#1   | 126.04(10) | O(1)-Tb(1)-O(1W)   | 138.96(11) | O(1W)-Tb(1)-O(2W)   | 65.44(11)  |
| O(1)-Tb(1)-O(5)#1   | 77.23(10)  | O(2)#1-Tb(1)-O(1W) | 74.21(11)  | O(4)-Tb(1)-O(4)#1   | 75.94(10)  |
| O(2)#1-Tb(1)-O(5)#1 | 94.52(11)  | O(5)#1-Tb(1)-O(1W) | 135.78(11) | O(1)-Tb(1)-O(4)#1   | 68.47(9)   |
| O(4)-Tb(1)-O(8)     | 138.91(10) | O(8)-Tb(1)-O(1W)   | 83.05(12)  | O(2)#1-Tb(1)-O(4)#1 | 73.55(9)   |
| O(1)-Tb(1)-O(8)     | 80.46(10)  | O(7)-Tb(1)-O(1W)   | 65.17(12)  | O(5)#1-Tb(1)-O(4)#1 | 50.70(9)   |
| O(2)#1-Tb(1)-O(8)   | 140.58(10) | O(4)-Tb(1)-O(2W)   | 141.89(11) | O(8)-Tb(1)-O(4)#1   | 125.20(10) |
| O(5)#1-Tb(1)-O(8)   | 79.70(11)  | O(1)-Tb(1)-O(2W)   | 140.63(11) | O(7)-Tb(1)-O(4)#1   | 142.34(10) |
| O(4)-Tb(1)-O(7)     | 87.66(11)  | O(2)#1-Tb(1)-O(2W) | 69.19(12)  | O(1W)-Tb(1)-O(4)#1  | 147.62(11) |
| O(1)-Tb(1)-O(7)     | 74.83(11)  | O(5)#1-Tb(1)-O(2W) | 70.55(11)  | O(2W)-Tb(1)-O(4)#1  | 105.24(10) |

---

**10**

|              |          |            |          |            |          |
|--------------|----------|------------|----------|------------|----------|
| Tb(1)-O(7)#1 | 2.252(3) | Tb(1)-O(1) | 2.411(4) | Tb(1)-N(2) | 2.560(4) |
|--------------|----------|------------|----------|------------|----------|

|                     |            |                     |            |                   |            |
|---------------------|------------|---------------------|------------|-------------------|------------|
| Tb(1)-O(7)          | 2.270(3)   | Tb(1)-O(2)          | 2.465(4)   | Tb(1)-N(1)        | 2.574(4)   |
| Tb(1)-O(5)#2        | 2.400(4)   | Tb(1)-O(4)#2        | 2.517(4)   |                   |            |
| O(7)#1-Tb(1)-O(7)   | 70.13(14)  | O(7)#1-Tb(1)-O(4)#2 | 82.91(12)  | O(2)-Tb(1)-N(2)   | 80.37(13)  |
| O(7)#1-Tb(1)-O(5)#2 | 135.28(13) | O(7)-Tb(1)-O(4)#2   | 147.70(12) | O(4)#2-Tb(1)-N(2) | 113.05(14) |
| O(7)-Tb(1)-O(5)#2   | 153.76(13) | O(5)#2-Tb(1)-O(4)#2 | 53.15(13)  | O(7)#1-Tb(1)-N(1) | 85.69(15)  |
| O(7)#1-Tb(1)-O(1)   | 85.26(14)  | O(1)-Tb(1)-O(4)#2   | 86.42(14)  | O(7)-Tb(1)-N(1)   | 84.99(15)  |
| O(7)-Tb(1)-O(1)     | 108.03(15) | O(2)-Tb(1)-O(4)#2   | 125.24(13) | O(5)#2-Tb(1)-N(1) | 90.17(16)  |
| O(5)#2-Tb(1)-O(1)   | 84.17(17)  | O(7)#1-Tb(1)-N(2)   | 138.76(13) | O(1)-Tb(1)-N(1)   | 160.47(15) |
| O(7)#1-Tb(1)-O(2)   | 122.51(13) | O(7)-Tb(1)-N(2)     | 79.36(13)  | O(2)-Tb(1)-N(1)   | 144.36(14) |
| O(7)-Tb(1)-O(2)     | 85.26(13)  | O(5)#2-Tb(1)-N(2)   | 75.35(15)  | O(4)#2-Tb(1)-N(1) | 75.31(15)  |
| O(5)#2-Tb(1)-O(2)   | 83.78(14)  | O(1)-Tb(1)-N(2)     | 131.42(14) | N(2)-Tb(1)-N(1)   | 64.15(15)  |
| O(1)-Tb(1)-O(2)     | 53.60(12)  |                     |            |                   |            |

---

**11**

|                   |            |                   |            |                   |            |
|-------------------|------------|-------------------|------------|-------------------|------------|
| Dy(1)-O(7)        | 2.238(3)   | Dy(1)-O(2)        | 2.395(3)   | Dy(1)-N(2)        | 2.539(4)   |
| Dy(1)-O(7)#1      | 2.254(3)   | Dy(1)-O(1)        | 2.450(3)   | Dy(1)-N(1)        | 2.549(4)   |
| Dy(1)-O(3)        | 2.379(4)   | Dy(1)-O(4)        | 2.499(4)   |                   |            |
| O(7)-Dy(1)-O(7)#1 | 70.15(13)  | O(7)-Dy(1)-O(4)   | 82.64(11)  | O(1)-Dy(1)-N(2)   | 80.02(12)  |
| O(7)-Dy(1)-O(3)   | 135.45(12) | O(7)#1-Dy(1)-O(4) | 147.74(11) | O(4)-Dy(1)-N(2)   | 113.37(12) |
| O(7)#1-Dy(1)-O(3) | 153.54(12) | O(3)-Dy(1)-O(4)   | 53.51(11)  | O(7)-Dy(1)-N(1)   | 85.68(13)  |
| O(7)-Dy(1)-O(2)   | 85.30(12)  | O(2)-Dy(1)-O(4)   | 85.97(13)  | O(7)#1-Dy(1)-N(1) | 85.66(14)  |
| O(7)#1-Dy(1)-O(2) | 108.02(13) | O(1)-Dy(1)-O(4)   | 125.33(12) | O(3)-Dy(1)-N(1)   | 89.57(14)  |
| O(3)-Dy(1)-O(2)   | 84.32(14)  | O(7)-Dy(1)-N(2)   | 139.07(14) | O(2)-Dy(1)-N(1)   | 159.86(14) |
| O(7)-Dy(1)-O(1)   | 122.54(11) | O(7)#1-Dy(1)-N(2) | 79.63(13)  | O(1)-Dy(1)-N(1)   | 144.53(12) |
| O(7)#1-Dy(1)-O(1) | 84.98(12)  | O(3)-Dy(1)-N(2)   | 74.83(14)  | O(4)-Dy(1)-N(1)   | 75.04(14)  |
| O(3)-Dy(1)-O(1)   | 83.93(12)  | O(2)-Dy(1)-N(2)   | 131.17(12) | N(2)-Dy(1)-N(1)   | 64.64(13)  |
| O(2)-Dy(1)-O(1)   | 53.85(12)  |                   |            |                   |            |

---

**12**

|                   |           |                   |           |                 |           |
|-------------------|-----------|-------------------|-----------|-----------------|-----------|
| Er(1)-O(7)#1      | 2.218(3)  | Er(1)-O(2)        | 2.377(3)  | Er(1)-N(1)      | 2.524(4)  |
| Er(1)-O(7)        | 2.250(3)  | Er(1)-O(1)        | 2.433(3)  | Er(1)-N(2)      | 2.529(4)  |
| Er(1)-O(4)        | 2.365(3)  | Er(1)-O(3)        | 2.484(3)  |                 |           |
| O(7)#1-Er(1)-O(7) | 70.70(12) | O(7)#1-Er(1)-O(3) | 81.60(11) | O(1)-Er(1)-N(1) | 79.63(12) |

|                   |            |                   |            |                   |            |
|-------------------|------------|-------------------|------------|-------------------|------------|
| O(7)#1-Er(1)-O(4) | 135.25(12) | O(7)-Er(1)-O(3)   | 147.78(10) | O(3)-Er(1)-N(1)   | 114.62(12) |
| O(7)-Er(1)-O(4)   | 153.24(12) | O(4)-Er(1)-O(3)   | 54.23(11)  | O(7)#1-Er(1)-N(2) | 85.34(12)  |
| O(7)#1-Er(1)-O(2) | 85.12(11)  | O(2)-Er(1)-O(3)   | 84.51(12)  | O(7)-Er(1)-N(2)   | 85.87(12)  |
| O(7)-Er(1)-O(2)   | 108.48(12) | O(1)-Er(1)-O(3)   | 124.86(11) | O(4)-Er(1)-N(2)   | 89.71(13)  |
| O(4)-Er(1)-O(2)   | 83.97(13)  | O(7)#1-Er(1)-N(1) | 139.54(12) | O(2)-Er(1)-N(2)   | 158.95(13) |
| O(7)#1-Er(1)-O(1) | 122.85(11) | O(7)-Er(1)-N(1)   | 79.49(12)  | O(1)-Er(1)-N(2)   | 144.91(12) |
| O(7)-Er(1)-O(1)   | 85.01(11)  | O(4)-Er(1)-N(1)   | 74.69(13)  | O(3)-Er(1)-N(2)   | 75.56(13)  |
| O(4)-Er(1)-O(1)   | 83.57(11)  | O(2)-Er(1)-N(1)   | 131.10(12) | N(1)-Er(1)-N(2)   | 65.41(13)  |
| O(2)-Er(1)-O(1)   | 54.27(11)  |                   |            |                   |            |

---

**13**

|                   |            |                   |            |                   |            |
|-------------------|------------|-------------------|------------|-------------------|------------|
| Yb(1)-O(7)#1      | 2.196(4)   | Yb(1)-O(2)        | 2.353(4)   | Yb(1)-N(1)        | 2.496(6)   |
| Yb(1)-O(7)        | 2.229(4)   | Yb(1)-O(1)        | 2.422(5)   | Yb(1)-N(2)        | 2.504(5)   |
| Yb(1)-O(3)        | 2.347(4)   | Yb(1)-O(4)        | 2.474(5)   |                   |            |
| O(7)#1-Yb(1)-O(7) | 70.78(17)  | O(7)#1-Yb(1)-O(4) | 80.81(15)  | O(1)-Yb(1)-N(1)   | 145.18(17) |
| O(7)#1-Yb(1)-O(3) | 135.36(16) | O(7)-Yb(1)-O(4)   | 147.50(15) | O(4)-Yb(1)-N(1)   | 75.82(17)  |
| O(7)-Yb(1)-O(3)   | 153.03(16) | O(3)-Yb(1)-O(4)   | 55.03(15)  | O(7)#1-Yb(1)-N(2) | 139.86(17) |
| O(7)#1-Yb(1)-O(2) | 84.73(17)  | O(2)-Yb(1)-O(4)   | 83.44(17)  | O(7)-Yb(1)-N(2)   | 79.62(16)  |
| O(7)-Yb(1)-O(2)   | 108.64(17) | O(1)-Yb(1)-O(4)   | 125.15(15) | O(3)-Yb(1)-N(2)   | 74.33(17)  |
| O(3)-Yb(1)-O(2)   | 84.14(18)  | O(7)#1-Yb(1)-N(1) | 85.20(18)  | O(2)-Yb(1)-N(2)   | 131.27(18) |
| O(7)#1-Yb(1)-O(1) | 122.59(17) | O(7)-Yb(1)-N(1)   | 86.15(18)  | O(1)-Yb(1)-N(2)   | 79.38(17)  |
| O(7)-Yb(1)-O(1)   | 84.53(16)  | O(3)-Yb(1)-N(1)   | 89.51(18)  | O(4)-Yb(1)-N(2)   | 115.61(17) |
| O(3)-Yb(1)-O(1)   | 83.97(17)  | O(2)-Yb(1)-N(1)   | 158.14(19) | N(1)-Yb(1)-N(2)   | 65.95(19)  |
| O(2)-Yb(1)-O(1)   | 54.90(16)  |                   |            |                   |            |

---

**14**

|                   |          |                  |           |                  |          |
|-------------------|----------|------------------|-----------|------------------|----------|
| Er(1)-O(3)        | 2.241(5) | Er(1)-O(1)       | 2.417(6)  | Er(1)-O(1W)      | 2.452(6) |
| Er(1)-O(7)        | 2.292(6) | Er(1)-O(2W)      | 2.427(6)  | Er(1)-O(2)       | 2.392(6) |
| Er(1)-O(4)        | 2.322(5) | Er(1)-O(8)#1     | 2.366(5)  |                  |          |
| O(3)-Er(1)-O(7)   | 73.6(2)  | O(2)-Er(1)-O(1)  | 54.30(19) | O(2)-Er(1)-O(2W) | 91.9(2)  |
| O(3)-Er(1)-O(4)   | 123.8(2) | O(3)-Er(1)-O(2W) | 146.2(2)  | O(1)-Er(1)-O(2W) | 69.6(2)  |
| O(7)-Er(1)-O(4)   | 80.6(2)  | O(7)-Er(1)-O(2W) | 140.1(2)  | O(3)-Er(1)-O(1W) | 76.1(3)  |
| O(3)-Er(1)-O(8)#1 | 81.1(2)  | O(4)-Er(1)-O(2W) | 75.2(2)   | O(7)-Er(1)-O(1W) | 141.7(2) |

|                   |           |                    |            |                    |          |
|-------------------|-----------|--------------------|------------|--------------------|----------|
| O(7)-Er(1)-O(8)#1 | 127.3(2)  | O(8)#1-Er(1)-O(2W) | 76.8(2)    | O(4)-Er(1)-O(1W)   | 136.6(2) |
| O(4)-Er(1)-O(8)#1 | 76.42(19) | O(3)-Er(1)-O(1)    | 134.2(2)   | O(8)#1-Er(1)-O(1W) | 68.9(2)  |
| O(3)-Er(1)-O(2)   | 88.9(2)   | O(7)-Er(1)-O(1)    | 76.8(2)    | O(2)-Er(1)-O(1W)   | 71.3(2)  |
| O(7)-Er(1)-O(2)   | 85.3(2)   | O(4)-Er(1)-O(1)    | 83.81(18)  | O(1)-Er(1)-O(1W)   | 110.1(2) |
| O(4)-Er(1)-O(2)   | 137.9(2)  | O(8)#1-Er(1)-O(1)  | 144.35(19) | O(2W)-Er(1)-O(1W)  | 72.3(2)  |
| O(8)#1-Er(1)-O(2) | 140.2(2)  |                    |            |                    |          |

---

**15**

---

|                     |            |                    |            |                    |            |
|---------------------|------------|--------------------|------------|--------------------|------------|
| Ho(1)-O(2)          | 2.250(4)   | Ho(1)-O(2W)        | 2.399(4)   | Ho(1)-O(1W)        | 2.454(4)   |
| Ho(1)-O(8)          | 2.283(3)   | Ho(1)-O(4)         | 2.427(4)   | Ho(1)-O(3)         | 2.386(3)   |
| Ho(1)-O(1)#1        | 2.339(3)   | Ho(1)-O(7)#1       | 2.380(3)   |                    |            |
| O(2)-Ho(1)-O(8)     | 73.63(14)  | O(3)-Ho(1)-O(2W)   | 91.69(14)  | O(3)-Ho(1)-O(4)    | 54.39(12)  |
| O(2)-Ho(1)-O(1)#1   | 123.79(14) | O(2)-Ho(1)-O(4)    | 134.84(12) | O(2W)-Ho(1)-O(4)   | 69.55(13)  |
| O(8)-Ho(1)-O(1)#1   | 81.02(12)  | O(8)-Ho(1)-O(4)    | 76.57(14)  | O(2)-Ho(1)-O(1W)   | 75.60(15)  |
| O(2)-Ho(1)-O(7)#1   | 80.66(13)  | O(1)#1-Ho(1)-O(4)  | 83.16(12)  | O(8)-Ho(1)-O(1W)   | 140.75(13) |
| O(8)-Ho(1)-O(7)#1   | 128.26(12) | O(7)#1-Ho(1)-O(4)  | 144.21(13) | O(1)#1-Ho(1)-O(1W) | 137.25(12) |
| O(1)#1-Ho(1)-O(7)#1 | 77.24(12)  | O(2)-Ho(1)-O(2W)   | 145.64(13) | O(7)#1-Ho(1)-O(1W) | 68.51(12)  |
| O(2)-Ho(1)-O(3)     | 89.31(14)  | O(8)-Ho(1)-O(2W)   | 140.62(14) | O(3)-Ho(1)-O(1W)   | 71.50(13)  |
| O(8)-Ho(1)-O(3)     | 84.30(13)  | O(1)#1-Ho(1)-O(2W) | 75.68(13)  | O(2W)-Ho(1)-O(1W)  | 72.22(14)  |
| O(1)#1-Ho(1)-O(3)   | 137.29(13) | O(7)#1-Ho(1)-O(2W) | 76.68(13)  | O(4)-Ho(1)-O(1W)   | 110.42(13) |
| O(7)#1-Ho(1)-O(3)   | 140.01(12) |                    |            |                    |            |

---

<sup>e</sup>Symmetry transformations used to generate equivalent atoms: For **1**: #1,  $-x + 1, -y + 1, -z + 1$ . For **2**: #1,  $-x + 1, -y + 1, -z + 1$ . For **3**: #1,  $-x + 2, -y + 2, -z + 1$ . For **4**: #1,  $-x + 1, -y + 1, -z$ . For **5**: #1,  $-x + 1, -y, -z + 1$ . For **6**: #1,  $-x, -y, -z + 1$ . For **10**: #1,  $-x + 1, -y + 1, -z + 1$ ; #2,  $-x + 1, -y + 1/2, -z + 3/2$ . For **11**: #1,  $-x + 1, -y + 1, -z + 1$ . For **12**: #1,  $-x + 1, -y + 1, -z + 1$ . For **13**: #1,  $-x + 1, -y + 1, -z + 1$ . For **14**: #1,  $-x + 1, -y + 1, -z + 1$ . For **15**: #1,  $-x + 1, -y + 1, -z + 1$ .

### Reference

1. A. Panagiotopoulos, T. F. Zafiropoulos, S. P. Perlepes, E. Bakalbassis, I. Masson-Ramade, O. Kahn, A. Terzis and C. P. Raptopoulou, *Inorg. Chem.*, 1995, **34**, 4918-4920.
